# Supplementary material for: The evolution of zonally asymmetric austral ozone in a chemistry–climate model
Source: Copernicus journal article supplement (doi:10.5194/acp-17-14075-2017), 2017-11-27
Supplement: Supplementary file 1 [file acp-17-14075-2017-supplement.zip]

Archive with 5 entries (5 files):
- EllipseFitByTaubin.m
- ellipse_error.m
- fit_ellipse.m
- frac_overlap.m
- acp-17-14075-2017-supplement-title-page.pdf
