# Supplementary material for: The evolution of zonally asymmetric austral ozone in a chemistry–climate model
Source: Copernicus journal article supplement (doi:10.5194/acp-17-14075-2017), 2017-11-27
Supplement: Supplementary file 1 [file acp-17-14075-2017-supplement.zip › acp-17-14075-2017-supplement-title-page.pdf]

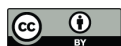

## *Supplement of*

# **The evolution of zonally asymmetric austral ozone in a chemistry–climate model**

**Fraser Dennison et al.**

*Correspondence to:* Fraser Dennison ([fraser.dennison@niwa.co.nz](mailto:fraser.dennison@niwa.co.nz))

- [acp-17-14075-2017-supplement-title-page.pdf](#)
- [EllipseFitByTaubin.m](#)
- [ellipse\\_error.m](#)
- [fit\\_ellipse.m](#)
- [frac\\_overlap.m](#)

The copyright of individual parts of the supplement might differ from the CC BY 3.0 License.
