# Supplementary material for: The evolution of zonally asymmetric austral ozone in a chemistry–climate model
Source: Copernicus journal article supplement (doi:10.5194/acp-17-14075-2017), 2017-11-27
Supplement: Supplementary file 1 [file acp-17-14075-2017-supplement.zip › ellipse_error.m]

function [sigma_x0,sigma_y0,sigma_e,sigma_ell]=ellipse_error(x,y,a,x0,y0,ecc)
    
    % Based on McDonald K.T. 2014
    % www.physics.princeton.edu/mumu/target/ellipse.pdf
    
    a = -a(1:5)/a(6);
    % check param
    if ~(a(1)>0 && a(3)>0 && a(2)^2<(4*a(1)*a(3)))
        disp('bad ellipse param?')
    end
    
    m=length(x);
    z=[x.^2,x.*y,y.^2,x,y];
    s2=zeros(5);
    for ii=1:5
        for jj=ii:5
            num=sum((z*a(1:5)-1).^2);
            den=(m-5)*z(:,ii)'*z(:,jj);
            s2(ii,jj)=num/den;
        end
    end
    if sum(s2<0)>0
        disp('neg sigmas')
    end
    
    sigma_a=sqrt(diag(s2))./abs(a)*100;
    
    sigma_x0 = (a(5)*(a(5)*s2(2,2) + a(2)*s2(2,5) - 2*a(4)*s2(2,3) - 2*a(3)*s2(2,4) - ...
        x0*(4*a(3)*s2(1,2) + 4*a(1)*s2(2,3) - 2*a(2)*s2(2,2))) + ...
        a(2)*(a(5)*s2(2,5) + a(2)*s2(5,5) - 2*a(4)*s2(3,5) - 2*a(3)*s2(4,5) - ...
        x0*(4*a(3)*s2(1,5) + 4*a(1)*s2(3,5) - 2*a(2)*s2(2,5))) + ...
        -2*a(4)*(a(5)*s2(2,3) + a(2)*s2(3,5) - 2*a(4)*s2(3,3) - 2*a(3)*s2(3,4) - ...
        x0*(4*a(3)*s2(1,3) + 4*a(1)*s2(3,3) - 2*a(2)*s2(2,3))) + ...
        -2*a(3)*(a(5)*s2(2,4) + a(2)*s2(4,5) - 2*a(4)*s2(3,4) - 2*a(3)*s2(4,4) - ...
        x0*(4*a(3)*s2(1,4) + 4*a(1)*s2(3,4) - 2*a(2)*s2(2,4))) + ...
        -x0*4*a(3)*(a(5)*s2(1,2) + a(2)*s2(1,5) - 2*a(4)*s2(1,3) - 2*a(3)*s2(1,4) - ...
        x0*(4*a(3)*s2(1,1) + 4*a(1)*s2(1,3) - 2*a(2)*s2(1,2))) + ...
        -x0*4*a(1)*(a(5)*s2(2,3) + a(2)*s2(3,5) - 2*a(4)*s2(3,3) - 2*a(3)*s2(3,4) - ...
        x0*(4*a(3)*s2(1,3) + 4*a(1)*s2(3,3) - 2*a(2)*s2(2,3))) + ...
        x0*2*a(2)*(a(5)*s2(2,2) + a(2)*s2(2,5) - 2*a(4)*s2(2,3) - 2*a(3)*s2(2,4) - ...
        x0*(4*a(3)*s2(1,2) + 4*a(1)*s2(2,3) - 2*a(2)*s2(2,2))))/...
        (4*a(1)*a(3) - a(2)^2)^2;
    
    sigma_y0 = (a(4)*(a(4)*s2(2,2) + a(2)*s2(2,4) - 2*a(5)*s2(2,3) - 2*a(3)*s2(2,5) - ...
        y0*(4*a(3)*s2(1,2) + 4*a(1)*s2(2,3) - 2*a(2)*s2(2,2))) + ...
        a(2)*(a(4)*s2(2,4) + a(2)*s2(4,4) - 2*a(5)*s2(3,4) - 2*a(3)*s2(4,5) - ...
        y0*(4*a(3)*s2(1,4) + 4*a(1)*s2(3,4) - 2*a(2)*s2(2,4))) + ...
        -2*a(5)*(a(4)*s2(2,3) + a(2)*s2(3,4) - 2*a(5)*s2(3,3) - 2*a(3)*s2(3,5) - ...
        y0*(4*a(3)*s2(1,3) + 4*a(1)*s2(3,3) - 2*a(2)*s2(2,3))) + ...
        -2*a(3)*(a(4)*s2(2,5) + a(2)*s2(4,5) - 2*a(5)*s2(3,5) - 2*a(3)*s2(5,5) - ...
        y0*(4*a(3)*s2(1,5) + 4*a(1)*s2(3,5) - 2*a(2)*s2(2,5))) + ...
        -y0*4*a(3)*(a(4)*s2(1,2) + a(2)*s2(1,4) - 2*a(5)*s2(1,3) - 2*a(3)*s2(1,5) - ...
        y0*(4*a(3)*s2(1,1) + 4*a(1)*s2(1,3) - 2*a(2)*s2(1,2))) + ...
        -y0*4*a(1)*(a(4)*s2(2,3) + a(2)*s2(3,4) - 2*a(5)*s2(3,3) - 2*a(3)*s2(3,5) - ...
        y0*(4*a(3)*s2(1,3) + 4*a(1)*s2(3,3) - 2*a(2)*s2(2,3))) + ...
        y0*2*a(2)*(a(4)*s2(2,2) + a(2)*s2(2,4) - 2*a(5)*s2(2,3) - 2*a(3)*s2(2,5) - ...
        y0*(4*a(3)*s2(1,2) + 4*a(1)*s2(2,3) - 2*a(2)*s2(2,2))))/...
        (4*a(1)*a(3) - a(2)^2)^2;
    
    
    S = sqrt(a(2)^2+(a(1)-a(3))^2);
    cp = a(1) + a(3) + S;
    cm = a(1) + a(3) - S;
    ell = sqrt(cp/cm);
    d1 = a(2)^2 - 2*a(3)*(a(1)-a(3));
    d2 = a(2)*(a(1)+a(3));
    d3 = a(2)^2 + 2*a(1)*(a(1)-a(3));
    
    sigma_ell  = 1/(ell*S*cm^2) * sqrt(abs(d1^2*s2(1,1) + d2^2*s2(2,2) + d3^2*s2(3,3) -...
        2*d1*d2*s2(1,2) - 2*d2*d3*s2(2,3) + 2*d1*d3*s2(1,3)));
    
    ecc1 = sqrt(1-1/(ell-sigma_ell)^2);
    ecc2 = sqrt(1-1/(ell+sigma_ell)^2);
    sigma_e = (ecc2-ecc1)/2;
    
    
    
    
    

    
    
