# Supplementary material for: The evolution of zonally asymmetric austral ozone in a chemistry–climate model
Source: Copernicus journal article supplement (doi:10.5194/acp-17-14075-2017), 2017-11-27
Supplement: Supplementary file 1 [file acp-17-14075-2017-supplement.zip › frac_overlap.m]

function f = frac_overlap(lat1,lon1,lat2,lon2)
    
lonx = 0:.5:359.5;
lon1=lon1(2:end); lat1=lat1(2:end); %lon2=[lon2,360]; lat2=[lat2,lat2(1)];
lon2=lon2(2:end); lat2=lat2(2:end);
[lon1,s1]=sort(lon1);  lat1=lat1(s1);
[lon2,s2]=sort(lon2);  lat2=lat2(s2);

lat1x = interp1(lon1,lat1,lonx,'spline','extrap');
lat2x = interp1(lon2,lat2,lonx,'spline','extrap');

latmin = min([lat1x;lat2x],[],1);

%[lat1x',lat2x',lonx']

a1=areaint(lat1x,lonx);
a2=areaint(lat2x,lonx);

aint=areaint(latmin,lonx);

f = (a1+a2-2*aint)/a1;
